# Supplementary material for: RETRACTED: Wogonin Suppresses the Activity of Matrix Metalloproteinase-9 and Inhibits Migration and Invasion in Human Hepatocellular Carcinoma
Source: MDPI journal article supplement (doi:10.3390/molecules23020384), 2018-02-09
Supplement: s1 [file s1]

Supplementary Table 1. Cancer metastasis related protein for docking study

| <b>Number</b> | <b>Gene</b>    | <b>Protein</b>                                             |
|---------------|----------------|------------------------------------------------------------|
| No.1          | <i>HTCF4</i>   | Human T-Cell Transcription<br>Factor-4                     |
| No.2          | <i>EXO1</i>    | exonuclease 1                                              |
| No.3          | <i>DLC-1</i>   | Deleted in liver cancer-1                                  |
| No.4          | <i>SLC19A1</i> | solute carrier family 19 (folate<br>transporter), member 1 |
| No.5          | <i>NQO1</i>    | NAD(P)H dehydrogenase, quinone<br>1                        |
| No.6          | <i>MIEN1</i>   | migration and invasion enhancer 1                          |
| No.7          | <i>SCAI</i>    | suppressor of cancer cell invasion                         |
| No.8          | <i>DHFR</i>    | dihydrofolate reductase                                    |
| No.9          | <i>VEGFR1</i>  | Vascular endothelial growth factor<br>receptor 1           |
| No.10         | <i>GSTP1</i>   | glutathione S-transferase pi 1                             |
| No.11         | <i>MIIP</i>    | migration and invasion inhibitory<br>protein               |
| No.12         | <i>TIAM1</i>   | T-cell lymphoma invasion and<br>metastasis 1               |
| No.13         | <i>MAPKs</i>   | Mitogen-activated protein kinases                          |
| No.14         | <i>PTEN</i>    | phosphatase and tensin homolog                             |
| No.15         | <i>EGFR</i>    | epidermal growth factor receptor                           |
| No.16         | <i>ICAM-1</i>  | Intercellular Adhesion Molecule 1                          |
| No.17         | <i>ITGB4</i>   | Integrin-beta 4                                            |
| No.18         | <i>GSTM3</i>   | glutathione S-transferase mu 3                             |
| No.19         | <i>MLCK</i>    | Myosin light-chain kinase                                  |
| No.20         | <i>SOD3</i>    | superoxide dismutase 3,<br>extracellular                   |

---

|       |                                |                                                              |
|-------|--------------------------------|--------------------------------------------------------------|
| No.21 | <i>TIAM2</i>                   | T-cell lymphoma invasion and metastasis 2                    |
| No.22 | <i>TTIM1</i>                   | T-cell tumor invasion and metastasis 1                       |
| No.23 | <i>NOS3</i>                    | nitric oxide synthase 3                                      |
| No.24 | <i>CCNB1IP1</i>                | cyclin B1 interacting protein 1, E3 ubiquitin protein ligase |
| No.25 | <i>MRI1</i>                    | methylthioribose-1-phosphate isomerase 1                     |
| No.26 | <i>STIM1</i>                   | Stromal interaction molecule 1                               |
| No.27 | <i>NQO1</i>                    | NAD(P)H dehydrogenase, quinone 1                             |
| No.28 | <i>CYP2D6</i>                  | cytochrome P450, family 2, subfamily D, polypeptide 6        |
| No.29 | <i>CEMIP</i>                   | cell migration inducing protein, hyaluronan binding          |
| No.30 | <i>CYP19A1</i>                 | cytochrome P450, family 19, subfamily A, polypeptide 1       |
| No.31 | <i>GSK-3<math>\beta</math></i> | Glycogen synthase kinase 3beta                               |
| No.32 | <i>AXIN</i>                    | axin                                                         |
| No.33 | <i>FN1</i>                     | fibronectin 1                                                |
| No.34 | <i>GSTT1</i>                   | glutathione S-transferase theta 1                            |
| No.35 | <i>A3AR</i>                    | Adenosine A3 receptor                                        |
| No.36 | <i>IGF1R</i>                   | Insulin-like growth factor I receptor                        |
| No.37 | <i>DLH5</i>                    | discs, large homolog 5                                       |
| No.38 | <i>HSP90</i>                   | Heat shock protein 90                                        |
| No.39 | <i>UMPS</i>                    | uridine monophosphate synthetase                             |
| No.40 | <i>MALAT1</i>                  | metastasis associated lung adenocarcinoma transcript 1       |

---

---

|       |                  |                                                               |
|-------|------------------|---------------------------------------------------------------|
|       |                  | (non-protein coding)                                          |
| No.41 | <i>REV3L</i>     | REV3-like, polymerase (DNA directed), zeta, catalytic subunit |
| No.42 | <i>MTSS1</i>     | metastasis suppressor 1                                       |
| No.43 | <i>UMPS</i>      | uridine monophosphate synthetase                              |
| No.44 | <i>MTA1</i>      | metastasis associated 1                                       |
| No.45 | <i>MTSS1L</i>    | metastasis suppressor 1-like                                  |
| No.46 | <i>SOD2</i>      | superoxide dismutase 2, mitochondrial                         |
| No.47 | <i>KISS1</i>     | KiSS-1 metastasis-suppressor                                  |
| No.48 | <i>MTA3</i>      | metastasis associated 1 family, member 3                      |
| No.49 | <i>WDR7</i>      | WD repeat domain 7                                            |
| No.50 | <i>MMP-9</i>     | matrix metalloproteinase 9                                    |
| No.51 | <i>PON1</i>      | paraoxonase 1                                                 |
| No.52 | <i>MMP-2</i>     | matrix metalloproteinase 2                                    |
| No.53 | <i>TK1</i>       | thymidine kinase 1, soluble                                   |
| No.54 | <i>MTA2</i>      | metastasis associated 2                                       |
| No.55 | <i>SDCCAG8</i>   | serologically defined colon cancer antigen 8                  |
| No.56 | <i>CASC2</i>     | cancer susceptibility candidate 2                             |
| No.57 | <i>SDCCAG3P1</i> | serologically defined colon cancer antigen 3 pseudogene 1     |
| No.58 | <i>HULC</i>      | highly up-regulated in liver cancer long non-coding RNA       |
| No.59 | <i>CT45B1P</i>   | cancer/testis antigen family 45, member B1 pseudogene         |
| No.60 | <i>CT45A7</i>    | cancer/testis antigen family 45, member A7                    |

---

|       |                  |                                                          |
|-------|------------------|----------------------------------------------------------|
| No.61 | <i>CT45A8</i>    | cancer/testis antigen family 45,<br>member A8            |
| No.62 | <i>CT45A9</i>    | cancer/testis antigen family 45,<br>member A9            |
| No.63 | <i>UGT2B17</i>   | UDP glucuronosyltransferase 2<br>family, polypeptide B17 |
| No.64 | <i>VEGFA</i>     | vascular endothelial growth factor<br>A                  |
| No.65 | <i>UGT2B4</i>    | UDP glucuronosyltransferase 2<br>family, polypeptide B4  |
| No.66 | <i>UGT2B5</i>    | UDP glucuronosyltransferase 2<br>family, polypeptide B5  |
| No.67 | <i>UGT2B6</i>    | UDP glucuronosyltransferase 2<br>family, polypeptide B6  |
| No.68 | <i>UGT2B7</i>    | UDP glucuronosyltransferase 2<br>family, polypeptide B7  |
| No.69 | <i>UGT2B8</i>    | UDP glucuronosyltransferase 2<br>family, polypeptide B8  |
| No.70 | <i>UPA</i>       | urokinase-type plasminogen<br>activator                  |
| No.70 | <i>TGFRB</i>     | Transforming growth factor<br>receptor b                 |
| No.71 | <i>OIP5</i>      | Opa interacting protein 5                                |
| No.72 | <i>SCF</i>       | Stem cell factor                                         |
| No.73 | <i>TNFRSF12A</i> | tumor necrosis factor receptor<br>superfamily member 12A |
| No.74 | <i>FAM46C</i>    | Family-with-sequence-similarity-46<br>C                  |
| No.75 | <i>NEK2</i>      | Never in mitosis gene A                                  |

---

|       |               |                                                                               |
|-------|---------------|-------------------------------------------------------------------------------|
|       |               | (NIMA)-related kinase 2                                                       |
| No.76 | <i>TALIN1</i> | Talin-1                                                                       |
| No.77 | <i>CAPZA1</i> | Capping Actin Protein Of Muscle<br>Z-Line Alpha Subunit 1                     |
| No.78 | <i>RKIP</i>   | Raf kinase inhibitor protein                                                  |
| No.79 | <i>BCL9</i>   | B-cell CLL/lymphoma 9                                                         |
| No.80 | <i>FAK</i>    | focal adhesion kinase                                                         |
| No.81 | <i>CHKA</i>   | Choline kinase alpha                                                          |
| No.82 | <i>RYBP</i>   | Ring1- and YY1-binding protein                                                |
| No.83 | <i>ALDH2</i>  | Aldehyde Dehydrogenase-2                                                      |
| No.84 | <i>NEK2</i>   | NIMA-related expressed kinase 2                                               |
| No.85 | <i>PRSS8</i>  | Protease serine 8                                                             |
| No.86 | <i>A7</i>     | Annexin seven                                                                 |
| No.87 | <i>TMED3</i>  | Transmembrane p24 trafficking<br>protein 3                                    |
| No.88 | <i>hEXO1</i>  | Human exonuclease 1                                                           |
| No.89 | <i>MAZ</i>    | MYC associated zinc finger protein                                            |
| No.90 | <i>MARCO</i>  | macrophage receptor with<br>collagenous structure                             |
| No.91 | <i>HACE1</i>  | HECT domain and ankyrin repeat<br>containing E3 ubiquitin protein<br>ligase 1 |
| No.92 | <i>CTSS</i>   | Cathepsin S                                                                   |
| No.93 | <i>GPC-3</i>  | membrane-associated heparan<br>sulfate proteoglycan glypican-3                |
| No.94 | <i>FBP1</i>   | fructose-1, 6-bisphosphatase 1                                                |
| No.95 | <i>Cav1</i>   | caveolin-1                                                                    |
| No.96 | <i>MSI2</i>   | Musashi 2                                                                     |
| No.97 | <i>TJP1</i>   | tight junction protein ZO-1                                                   |

---

---

|        |                                |                                                               |
|--------|--------------------------------|---------------------------------------------------------------|
| No.98  | <i>Ovol2</i>                   | Ovo-like family2                                              |
| No.99  | <i>IL-6</i>                    | Interleukin-6                                                 |
| No.100 | <i>USP16</i>                   | ubiquitin specific peptidase 16                               |
| No.101 | <i>Sulf-1</i>                  | Sulfatase-1                                                   |
| No.102 | <i>Hint1</i>                   | Histidine triad nucleotide-binding<br>protein 1               |
| No.103 | <i>GOLM1</i>                   | Golgi membrane protein 1                                      |
| No.104 | <i>SHP</i>                     | Small heterodimer partner                                     |
| No.105 | <i>EP3</i>                     | prostaglandin E receptor 3                                    |
| No.106 | <i>SOCS2</i>                   | cytokine signaling 2                                          |
| No.107 | <i>IKK<math>\alpha</math></i>  | inhibitor- $\kappa$ B kinase- $\alpha$                        |
| No.108 | <i>Sp1</i>                     | Transcription factor specificity<br>protein 1                 |
| No.109 | <i>HIF1<math>\alpha</math></i> | hypoxia-inducible factor 1 $\alpha$                           |
| No.110 | <i>AEG-1</i>                   | Astrocyte-elevated gene-1                                     |
| No.111 | <i>CDH1</i>                    | E-cadherin                                                    |
| No.112 | <i>DLX2</i>                    | Distal-less homeobox 2                                        |
| No.113 | <i>HDGF</i>                    | hepatoma-derived growth factor                                |
| No.114 | <i>RECK</i>                    | reversion-inducing-cysteine-rich<br>protein with Kazal motifs |
| No.115 | <i>PTPN12</i>                  | nonreceptor-type 12                                           |
| No.116 | <i>HUWE1</i>                   | WWE domain containing 1                                       |
| No.117 | <i>GAB1</i>                    | GRB2-associated binding protein 1                             |
| No.118 | <i>ASGR</i>                    | asialoglycoprotein receptor                                   |
| No.119 | <i>MTSS1</i>                   | Metastasis suppressor 1                                       |
| No.120 | <i>TMEM9</i>                   | transmembrane protein 9                                       |
| No.121 | <i>HNF4<math>\alpha</math></i> | Hepatocyte nuclear factor 4 $\alpha$                          |
| No.122 | <i>K19</i>                     | keratin 19                                                    |
| No.123 | <i>CTSC</i>                    | Cathepsin C                                                   |

---
